# Supplementary material
Source: HighWire-hosted journal article supplement (https://openres.ersjournals.com/content/7/3/00383-2021)
Supplement: inline-supplementary-material-1 [file inline-supplementary-material-1.pdf]

Table 1 suppl. Presents wording of the symptom questions and results of Cox regressions of each symptom versus admission to hospital or deaths related to COPD.

| Respiratory symptom                                             | yes<br>(n) | no<br>(n) | Wald's<br>$\chi^2$ | p      | Hazard<br>ratio | 95%<br>Confidence<br>limits |
|-----------------------------------------------------------------|------------|-----------|--------------------|--------|-----------------|-----------------------------|
| <b>Non-productive cough</b>                                     |            |           |                    |        |                 |                             |
| Cough usually in the morning during winter                      | 121        | 498       | 25.9               | 0.0001 | 4.21            | 2.42-7.32                   |
| Cough usually day or night during winter                        | 71         | 548       | 9.3                | 0.0023 | 2.72            | 1.43-5.17                   |
| Cough most days at least 3 months a year or more during winter  | 116        | 505       | 22.5               | 0.0001 | 3.82            | 2.20-6.63                   |
| <b>Productive cough</b>                                         |            |           |                    |        |                 |                             |
| Cough and expectorate usually in the morning                    | 123        | 496       | 19.1               | 0.0001 | 3.46            | 1.98-6.03                   |
| Cough and expectorate usually day or night in winter            | 50         | 570       | 14.7               | 0.0001 | 3.67            | 1.89-7.13                   |
| Cough and expectorate most days 3 months a year or more         | 101        | 519       | 21.5               | 0.0001 | 3.81            | 2.17-6.70                   |
| <b>Wheezing</b>                                                 |            |           |                    |        |                 |                             |
| Wheeze or squeaks any time                                      | 218        | 402       | 19.9               | 0.0001 | 3.55            | 2.04-6.19                   |
| Wheeze or squeaks any time connected with a common cold         | 157        | 461       | 17.1               | 0.0001 | 3.13            | 1.82-5.37                   |
| Wheeze or squeaks any time unconnected with a common cold       | 99         | 520       | 37.8               | 0.0001 | 5.50            | 3.19-9.47                   |
| Wheeze or squeaks most days a year                              | 32         | 586       | 26.0               | 0.0001 | 6.04            | 3.03-12.07                  |
| <b>Dyspnoea</b>                                                 |            |           |                    |        |                 |                             |
| Dyspnoea when walking fast on the level or waking up an incline | 162        | 451       | 28.5               | 0.0001 | 4.39            | 2.55-7.55                   |
| Dyspnoea when walking on the level at ordinary pace             | 29         | 589       | 12.1               | 0.0005 | 4.54            | 1.93-10.66                  |

n: number;  $\chi^2$ : chi-square; p: probability; p<0.05: significant.
